# Supplementary material
Source: publisher figshare collection journal article supplement (https://gsapubs.figshare.com/ndownloader/files/40838720)
Supplement: Supplementary file 1 [file 40838720]

## Sheet: Sheet1
	Table S3. Apatite fission track analysis results of the eastern Yanshan fold belt, northeastern Asia.
No.	NS	Area (cm2)	ρS (cm-2)	238U(ppm)	1σ	Dpar (µm)	Age (Ma)	1σ
L5-1	74	5.76e-05	1285000	22.6	1.3	1.81	112.793	14.6293
L5-2	112	0.0001165	961500	12.41	0.82	1.64	153.214	17.6659
L5-3	63	4.585e-05	1374000	18	1.2	1.72	150.977	21.5201
L5-4	91	8.942e-05	1018000	17.94	0.95	1.44	112.569	13.2206
L5-5	107	0.0001021	1048000	14.39	0.73	1.57	144.121	15.7345
L5-6	132	8.797e-05	1500000	21.1	1.5	1.65	140.719	15.8141
L5-7	90	7.511e-05	1198000	17.79	0.95	1.53	133.374	15.76
L5-8	98	8.911e-05	1100000	15.05	0.67	1.78	144.633	15.966
L5-9	134	0.0001059	1266000	19.14	0.91	1.64	131.027	12.9201
L5-10	128	9.911e-05	1291000	16.53	0.84	1.55	154.43	15.7449
L5-11	72	6.313e-05	1141000	21.18	0.93	1.61	106.916	13.4464
L5-12	76	6.052e-05	1256000	14.11	0.78	1.39	175.72	22.375
L5-13	74	6.993e-05	1058000	17.4	1.2	1.43	120.548	16.294
L5-14	87	9.159e-05	949900	17.22	0.99	1.62	109.457	13.3158
L5-15	70	6.356e-05	1101000	15.78	0.88	1.51	138.137	18.2192
L5-16	124	0.0001009	1229000	17.7	0.88	1.57	137.477	14.1116
L5-17	92	8.559e-05	1075000	18.25	0.74	1.77	116.814	13.0674
L5-18	84	6.339e-05	1325000	21.5	1.1	1.69	122.165	14.722
L5-19	47	4.351e-05	1080000	16.36	0.68	1.63	130.773	19.8346
L5-20	70	6.204e-05	1128000	15.66	0.75	1.53	142.56	18.3562
L5-21	63	6.768e-05	930800	16.85	0.77	1.64	109.61	14.6899
L5-22	94	7.7e-05	1221000	22.15	0.92	1.64	109.381	12.1622
L5-23	84	6.125e-05	1371000	16.78	0.91	1.81	161.468	19.6738
L5-24	118	8.595e-05	1373000	20.55	0.95	1.6	132.338	13.6325
L5-25	111	0.000105	1057000	16.9	0.99	1.67	123.964	13.8267
L6-1	52	4.474e-05	1162000	13.68	0.94	1.81	167.783	25.9669
L6-2	95	3.078e-05	3087000	45.9	2.8	1.96	133.205	15.8998
L6-3	121	6.895e-05	1755000	19.3	1.5	1.77	179.454	21.4632
L6-4	107	2.988e-05	3581000	57.7	3.8	1.89	123.018	14.39
L6-5	91	7.762e-05	1172000	16.9	1	1.88	137.309	16.5286
L6-6	71	4.642e-05	1529000	21	1.3	1.77	144.084	19.2862
L6-7	104	6.34e-05	1641000	30.1	2.1	1.91	108.189	13.02
L6-8	116	7.966e-05	1456000	21.1	1.3	1.8	136.634	15.2252
L6-9	83	6.519e-05	1273000	19.7	1.4	1.8	128.036	16.7422
L6-10	163	6.818e-05	2391000	39.2	2.3	1.83	120.922	11.834
L6-11	72	7.4e-05	973000	14.02	0.94	1.89	137.41	18.6312
L6-12	64	6.152e-05	1040000	14.98	0.96	1.96	137.459	19.309
L6-13	132	5.528e-05	2388000	28.9	1.7	1.97	163.274	17.1523
L6-14	166	7.547e-05	2199000	29.8	1.7	1.79	146.007	14.0641
L6-15	68	5.247e-05	1296000	15.36	0.87	1.61	166.678	22.3087
L6-16	87	4.253e-05	2045000	34.7	1.4	1.81	116.872	13.3879
L6-17	149	5.145e-05	2896000	40.4	1.9	1.65	141.88	13.4023
L6-18	118	3.979e-05	2966000	49.8	3	1.69	118.1	12.9929
L6-19	164	9.082e-05	1806000	28.7	1.7	1.94	124.715	12.2235
L6-20	220	8.408e-05	2616000	29.1	1.6	2.02	177.437	15.4366
L6-21	114	6.217e-05	1834000	22	1.3	1.87	164.705	18.2397
L6-22	116	4.215e-05	2752000	39.4	2.2	1.93	138.286	14.9825
L6-23	93	3.864e-05	2407000	36.2	2.3	1.97	131.709	16.0174
L6-24	102	8.822e-05	1156000	13.9	0.85	1.99	164.319	19.1228
L6-25	170	4.93e-05	3449000	43.1	2.8	2.07	158.186	15.8997
L6-26	116	8.306e-05	1397000	17.79	0.86	1.75	155.264	16.2528
L6-27	86	4.917e-05	1749000	21.99	0.95	2.19	157.235	18.2652
L6-28	78	8.225e-05	948300	14.6	0.88	1.84	128.689	16.5071
WWN-01	21	5.517e-05	380600	2.99	0.21	2.33	249.831	57.2717
WWN-02	4	4.66e-05	85830	1.257	0.082	2.84	135.217	68.1817
WWN-05	13	3.81e-05	341200	2.5	0.16	1.73	267.497	76.1399
WWN-06	8	4.461e-05	179300	4.3	0.28	2.01	82.9101	29.8062
WWN-07	10	3.796e-05	263400	1.92	0.14	1.61	268.855	87.2503
WN12L-02	33	8.036e-05	410600	1.192	0.083	1.35	654.917	122.789
WN12L-03	17	2.998e-05	567000	4.02	0.32	1.28	276.254	70.518
WN12L-04	6	2.611e-05	229800	4.07	0.26	1.39	112.013	46.2856
WN12L-09	4	2.447e-05	163400	1.132	0.07	1.53	282.581	142.367
L12-1	22	8.133e-05	270500	3.2	0.21	2.52	166.983	37.2492
L12-2	43	3.526e-05	1220000	14.5	1	2.87	166.216	27.8192
L12-3	10	3.791e-05	263800	4.82	0.42	2.95	108.606	35.6244
L12-4	6	5.136e-05	116800	1.16	0.1	2.5	198.415	82.789
L12-5	43	4.879e-05	881400	9.21	0.61	2.63	188.726	31.3777
L12-6	7	8.032e-05	87150	0.889	0.066	2.07	193.255	74.4393
L12-7	14	6.668e-05	209900	2.24	0.14	2.19	184.848	50.7355
L12-8	61	4.662e-05	1308000	15.7	1.1	2.71	164.605	24.0246
L12-9	73	6.836e-05	1068000	9.27	0.67	2.45	226.532	31.1615
L12-10	27	2.297e-05	1176000	12.88	0.88	2.8	180.177	36.7954
L12-11	16	7.066e-05	226400	2.28	0.16	2.82	195.715	50.8198
L12-12	44	3.604e-05	1221000	12.76	0.81	2.91	188.705	30.8676
L12-13	50	5.236e-05	954900	7.1	0.47	2.65	263.681	41.1731
L12-14	8	6.625e-05	120800	1.3	0.11	2.34	183.326	66.6461
L12-15	95	5.028e-05	1890000	19.9	1.1	2.62	187.316	21.83
L12-16	31	3.718e-05	833800	9.75	0.6	2.29	168.907	32.0678
L12-17	14	5.539e-05	252800	3.82	0.27	2.58	131.094	36.2408
L12-18	5	3.71e-05	134800	1.103	0.072	2.72	240.046	108.489
L12-19	94	6.764e-05	1390000	14.15	0.81	2.76	193.647	22.8431
L12-20	34	3.113e-05	1092000	9.92	0.67	2.32	216.613	39.9259
L12-21	58	5.045e-05	1150000	9.99	0.59	2.12	226.348	32.5889
L14-35	16	7.23e-05	221300	7.95	0.72	2.27	55.4671	14.7486
L14-17	14	6.385e-05	219300	7.41	0.72	2.32	58.9555	16.7655
L14-03	16	5.721e-05	279700	7.8	0.66	2.03	71.3646	18.8354
L14-24	22	5.682e-05	387200	9.03	0.61	2.1	85.2441	19.0646
L14-44	23	5.653e-05	406800	9.14	0.54	2.22	88.4592	19.1711
L14-23	19	5.13e-05	370400	8.24	0.85	2.15	89.3351	22.4714
L14-06	14	4.156e-05	336800	7.12	0.88	2.2	93.9753	27.6716
L14-46	28	8.034e-05	348500	7.33	0.71	2.22	94.4506	20.0575
L14-27	23	7.605e-05	302400	6.09	0.63	2.05	98.612	22.9535
L14-22	19	4.244e-05	447600	8.87	0.62	2.09	100.202	24.0313
L14-02	16	5.081e-05	314900	6.24	0.59	2.34	100.207	26.7837
L14-25	25	4.747e-05	526600	10	0.98	2.04	104.531	23.2812
L14-14	17	4.737e-05	358800	6.78	0.56	2.14	105.044	26.9137
L14-11	11	3.8e-05	289400	5.42	0.48	1.78	105.978	33.3034
L14-05	20	5.427e-05	368500	6.81	0.67	2.12	107.389	26.2344
L14-41	23	4.579e-05	502300	9.08	0.94	2.17	109.765	25.5533
L14-08	24	4.497e-05	533700	8.78	0.72	2.08	120.511	26.5102
L14-38	27	6.819e-05	396000	6.45	0.67	2.39	121.708	26.6169
L14-45	27	5.197e-05	519500	8.36	0.53	2.66	123.173	24.9577
L14-29	27	5.151e-05	524100	8.32	0.69	2.32	124.845	26.1623
L14-15	16	3.515e-05	455200	7.2	0.81	2.32	125.295	34.3492
L14-37	30	5.388e-05	556800	8.53	0.68	2.41	129.324	25.7638
L14-07	16	2.968e-05	539100	8.01	0.75	2.18	133.3	35.5856
L14-31	23	4.95e-05	464600	6.88	0.51	2.42	133.742	29.597
L14-39	19	3.263e-05	582400	8.54	0.61	2.18	135.051	32.4498
L14-32	38	6.454e-05	588800	8.57	0.78	2.51	136.047	25.3059
L14-30	19	2.966e-05	640700	9.12	0.69	2.36	139.078	33.5969
L14-18	16	4.303e-05	371800	5.27	0.46	2.12	139.662	36.9824
L14-04	18	3.859e-05	466500	6.6	0.66	2.21	139.919	35.8247
L14-28	23	4.133e-05	556500	7.6	0.6	2.11	144.895	32.3057
L14-12	38	8.085e-05	470000	6.3	0.61	2.3	147.594	27.8834
L14-19	17	3.163e-05	537500	7.19	0.54	2.37	147.894	37.5499
L14-43	34	6.768e-05	502400	6.6	0.51	2.44	150.562	28.3212
L14-36	25	4.768e-05	524300	6.79	0.62	2.25	152.703	33.573
L14-01	45	8.3e-05	542200	6.9	0.5	2.05	155.367	25.7521
L14-20	23	3.659e-05	628600	7.88	0.56	1.89	157.695	34.7389
L14-13	22	3.64e-05	604500	7.31	0.52	2.33	163.401	36.7252
L14-42	26	4.894e-05	531300	6.35	0.45	2.51	165.302	34.4699
L14-26	25	3.825e-05	653600	7.75	0.65	2.31	166.601	36.1314
L14-34	16	3.708e-05	431500	5.07	0.41	2.04	168.108	44.1711
L14-09	22	3.487e-05	630900	7.4	0.78	1.99	168.397	40.0506
L14-10	22	2.971e-05	740600	7.73	0.59	1.75	188.936	42.7849
L14-47	43	6.425e-05	669300	6.6	0.59	2.23	199.811	35.3203
L14-33	36	6.77e-05	531700	5.04	0.51	2.2	207.736	40.5043
L14-16	46	6.004e-05	766100	6.93	0.72	2.29	217.518	39.2339
L14-21	26	3.894e-05	667800	5.81	0.39	1.89	226.009	46.8485
L14-40	23	6.943e-05	331300	2.69	0.25	2.37	241.873	55.2168
L21-1	14	6.924e-05	202200	3.79	0.28	1.88	105.892	29.3621
L21-2	35	8.599e-05	407000	6.52	0.43	1.67	123.727	22.4491
L21-3	49	7.534e-05	650400	6.91	0.51	1.91	185.663	29.8539
L21-4	32	0.0001078	296900	3.98	0.22	1.72	147.583	27.335
L21-5	27	6.745e-05	400300	5.67	0.4	1.59	139.758	28.6467
L21-6	31	7.117e-05	435600	7.94	0.52	2.01	108.865	20.812
L21-7	49	8.273e-05	592300	8.14	0.56	1.78	143.996	22.8318
L21-8	46	4.779e-05	962600	11.65	0.88	1.96	163.268	27.0477
L21-9	33	9.796e-05	336900	4.47	0.37	2.14	149.091	28.7382
L21-10	28	5.185e-05	540100	5.71	0.35	1.39	186.565	37.0656
L21-11	33	5.586e-05	590700	7.68	0.59	2.58	152.112	28.9432
L21-12	21	5.134e-05	409000	6.4	0.37	1.73	126.637	28.5879
L21-13	26	6.69e-05	388700	5.87	0.47	1.73	131.172	27.7863
L21-14	13	5.443e-05	238800	4.08	0.24	1.39	116.078	32.9103
L21-15	13	4.882e-05	266300	5.25	0.31	1.69	100.718	28.5601
L21-16	20	5.291e-05	378000	5.99	0.39	1.72	125.065	29.1268
L21-17	24	5.161e-05	465100	7.74	0.61	1.93	119.145	26.0702
L21-18	21	5.619e-05	373700	5.79	0.5	1.77	127.885	30.0126
L21-19	23	0.0001005	228800	2.72	0.25	1.84	166.176	37.867
L21-20	20	6.633e-05	301500	6.09	0.47	1.61	98.3207	23.2578
L21-21	30	7.227e-05	415100	5.11	0.48	1.96	160.548	32.9638
L21-22	15	6.238e-05	240400	4.68	0.35	1.55	101.986	27.415
L21-23	14	2.972e-05	471100	8.16	0.8	1.68	114.512	32.5988
L21-24	26	8.171e-05	318200	4.86	0.43	1.63	129.711	27.9075
L21-25	11	4.215e-05	261000	3.9	0.23	1.57	132.554	40.724
L36-1	20	8.171e-05	244800	2.17	0.18	1.4	221.895	52.9211
L36-2	9	0.0001122	80240	1.57	0.12	1.21	101.475	34.7029
L36-3	17	0.0001128	150700	1.42	0.11	1.31	208.958	53.2019
L36-4	20	8.226e-05	243100	5.07	0.5	1.26	95.248	23.2775
L36-5	16	0.0001011	158200	2.04	0.15	1.35	153.353	39.962
L36-6	19	0.0001206	157600	2.71	0.2	1.25	115.342	27.7967
L36-7	14	5.045e-05	277500	4.08	0.29	1.19	134.694	37.2499
L36-8	19	0.0001201	158100	1.93	0.16	1.25	161.883	39.4889
L36-9	20	9.174e-05	218000	0.939	0.068	1.34	448.624	105.445
L36-10	16	7.932e-05	201700	1.123	0.094	1.31	349.77	92.2135
L36-11	9	6.954e-05	129400	1.49	0.13	1.37	171.494	59.0905
L36-12	15	0.0001142	131400	1.41	0.12	1.53	183.848	49.9817
L36-13	9	7.252e-05	124100	2.03	0.16	1.22	121.193	41.5117
L36-14	34	7.668e-05	443400	10.09	0.65	1.35	87.3474	16.0019
L36-15	11	7.923e-05	138800	0.845	0.056	1.26	320.612	98.9756
L36-16	16	0.0001109	144300	1.56	0.15	1.31	182.503	48.8842
L36-17	18	7.995e-05	225100	2.67	0.18	1.38	166.546	40.8293
L36-18	22	8.699e-05	252900	1.122	0.093	1.16	435.992	99.7315
L36-19	15	0.0001002	149800	1.319	0.098	1.33	223.364	60.0125
L36-20	18	8.863e-05	203100	2.07	0.16	1.51	193.419	47.9781
L36-21	86	0.0001012	849900	11.81	0.87	1.53	142.43	18.6005
L36-22	17	0.0001058	160600	1.77	0.11	1.11	179.068	44.8334
L36-23	18	9.332e-05	192900	1.155	0.083	1.22	325.851	80.2941
L36-24	9	5.531e-05	162700	1.67	0.1	1.2	192.077	65.0507
L36-25	5	3.805e-05	131400	2.08	0.14	1.19	125.198	56.6211
L36-26	23	0.0001017	226100	4.31	0.3	1.28	104.136	22.8918
L36-27	14	0.0001167	119900	1.5	0.11	1.35	158.01	43.7909
L23-1-1	21	9.612e-05	218500	3.45	0.23	1.54	125.513	28.6388
L23-1-2	33	0.0001125	293200	3.97	0.2	1.46	146.128	26.4814
L23-1-3	23	0.0001031	223200	4.79	0.29	1.51	92.5822	20.102
L23-1-4	27	0.0001312	205800	1.195	0.096	1.53	335.745	70.0178
L23-1-5	14	8.057e-05	173800	2.21	0.14	1.66	155.489	42.7077
L23-1-6	50	6.142e-05	814100	14.2	1	1.56	113.722	17.9664
L23-1-7	33	0.0001765	186900	0.882	0.088	1.68	410.699	82.4041
L23-1-8	15	6.876e-05	218100	3.77	0.21	1.62	114.745	30.3087
L23-1-9	37	5.674e-05	652100	9.3	0.7	1.49	138.816	25.0993
L23-1-10	30	0.0001119	268000	3.77	0.2	1.45	140.714	26.7532
L23-1-11	73	5.002e-05	1460000	21.3	1	1.44	135.733	17.1167
L23-1-12	114	7.772e-05	1467000	34	2	1.64	85.7729	9.48639
L23-1-13	93	6.067e-05	1533000	30.5	3.2	1.45	99.8084	14.7232
L23-1-14	82	6.283e-05	1305000	31.7	2.6	1.39	81.8619	11.2608
L23-1-15	29	0.0001143	253800	5.55	0.51	1.47	90.871	18.8274
L23-1-16	21	6.013e-05	349300	4.13	0.33	1.41	167.071	38.825
L23-1-17	18	7.146e-05	251900	4.51	0.56	1.54	110.817	29.5224
L23-1-18	55	6.771e-05	812300	7.47	0.62	1.5	214.022	33.8875
L23-1-19	30	0.0001019	294500	4.44	0.28	1.46	131.389	25.379
L23-1-20	25	9.728e-05	257000	3.61	0.24	1.47	140.916	29.6996
L23-1-21	17	8.382e-05	202800	4.67	0.31	1.5	86.3239	21.7066
L23-1-22	20	0.0001169	171100	3.65	0.25	1.39	93.1338	21.7804
L23-1-23	33	0.0001565	210900	3.93	0.22	1.47	106.508	19.4758
L23-1-24	29	7.689e-05	377200	4.34	0.34	1.52	171.624	34.5899
L23-1-25	26	0.00011	236400	4.09	0.22	1.55	114.643	23.3137
L23-1-26	20	8.222e-05	243300	2.48	0.15	1.56	193.397	44.7991
L23-1-27	27	8.777e-05	307600	4.36	0.32	1.55	139.662	28.7662
L23-1-28	36	9.645e-05	373300	4.26	0.24	1.58	173.021	30.4397
L23-1-29	37	0.0001689	219100	4.3	0.27	1.68	101.17	17.8041
L23-1-30	22	0.0001331	165300	3.34	0.2	1.23	98.2885	21.766
L23-1-31	24	0.0001147	209300	2.77	0.16	1.61	149.464	31.7072
L23-1-32	164	0.0001289	1272000	22	1.6	1.53	114.68	12.2374
L23-1-33	26	0.0001034	251400	2.77	0.18	1.47	179.114	37.0052
L23-1-34	18	6.833e-05	263400	1.98	0.16	1.6	260.87	65.001
L23-1-35	46	0.0001593	288700	3.58	0.21	1.44	159.395	25.2931
L23-1-36	26	9.95e-05	261300	3.62	0.24	1.56	142.857	29.5741
L23-1-37	41	0.0001527	268500	6.01	0.33	1.42	88.7905	14.6988
L23-1-38	26	0.0001177	220900	4.4	0.31	1.38	99.6946	20.7751
L23-1-39	22	8.464e-05	259900	3.88	0.22	1.49	132.675	29.2697
L23-1-40	21	4.947e-05	424500	8.76	0.5	1.54	96.2539	21.7109
L23-1-41	19	6.966e-05	272800	4.16	0.21	1.45	129.915	30.5175
L23-1-42	16	6.658e-05	240300	4.04	0.32	1.56	117.946	30.9312
L23-1-43	12	6.625e-05	181100	3.52	0.46	1.31	102.146	32.3677
L23-1-44	17	3.938e-05	431700	4.48	0.31	1.35	190.011	47.9234
L23-1-45	30	0.0001133	264800	4.47	0.28	1.56	117.473	22.6748
L23-1-46	54	6.643e-05	812900	12.58	0.62	1.4	128.035	18.5308
L23-1-47	151	5.554e-05	2719000	47.3	2.1	1.5	114.023	10.5702
L23-1-48	19	7.465e-05	254500	1.56	0.12	1.57	318.48	77.0621
L23-1-49	36	0.000129	279100	4.87	0.27	1.5	113.681	19.9676
L23-1-50	37	0.0001698	217900	3.34	0.22	1.5	129.253	22.8912
L23-1-51	14	7.336e-05	190800	2.34	0.15	1.56	161.144	44.289
L23-1-52	29	0.0001244	233200	3.05	0.17	1.38	151.222	29.319
L23-1-53	56	7.122e-05	786300	12.99	0.69	1.61	120.011	17.2577
L23-1-54	41	9.502e-05	431500	8.32	0.44	1.58	102.962	16.9768
L23-1-55	23	0.0001576	145900	0.767	0.063	1.59	369.856	82.8882
L23-1-56	27	0.0001461	184800	3.26	0.19	1.53	112.456	22.6128
L23-1-57	34	6.772e-05	502100	12.79	0.66	1.47	78.0868	13.9849
L23-1-58	89	5.863e-05	1518000	30.7	2.1	1.53	98.2002	12.3884
L23-1-59	39	0.0001208	322900	4.12	0.23	1.43	154.964	26.2789
L23-1-60	12	5.199e-05	230800	2.73	0.17	1.46	167.004	49.3188
L23-1-61	47	0.0001914	245500	2.58	0.18	1.49	187.666	30.344
L23-1-62	28	8.675e-05	322800	4.19	0.22	1.59	152.359	29.8838
L23-1-63	12	9.081e-05	132100	2.1	0.11	1.44	124.672	36.5773
L23-1-64	76	8.018e-05	947800	24.3	1.7	1.54	77.5864	10.4244
L23-1-65	25	4.767e-05	524500	8.35	0.44	1.5	124.494	25.7486
L23-1-66	89	7.784e-05	1143000	13.26	0.62	1.49	170.234	19.7223
L23-1-67	24	9.126e-05	263000	4.42	0.25	1.44	117.99	24.9921
L23-1-68	30	0.0001015	295700	6.47	0.35	1.36	90.8187	17.2937
L23-1-69	18	7.558e-05	238200	3.94	0.22	1.51	119.865	29.0344
L23-1-70	43	7.342e-05	585700	12.58	0.58	1.51	92.5052	14.7375
L23-1-71	31	0.0001207	256700	4.1	0.33	1.47	124.093	24.4234
L23-1-72	14	7.862e-05	178100	3.86	0.32	1.44	91.6803	25.6543
L23-1-73	21	5.875e-05	357500	5.46	0.48	1.46	129.717	30.5174
L23-1-74	49	9.275e-05	528300	9.32	0.42	1.63	112.451	16.8447
L23-1-75	25	7.276e-05	343600	3.68	0.2	1.57	184.195	38.1749
L23-1-76	29	4.109e-05	705700	7.16	0.69	1.72	194.284	40.6466
L23-1	45	0.000118	381300	5.04	0.3	1.77	149.65	24.0212
L23-2	38	0.0001385	274300	4.35	0.32	1.61	124.972	22.2602
L23-3	25	0.0001214	205900	3.83	0.26	1.49	106.696	22.535
L23-4	28	9.768e-05	286700	5.14	0.27	1.43	110.668	21.7072
L23-5	24	0.0001499	160100	2.29	0.15	1.54	138.413	29.6724
L23-6	163	8.116e-05	2008000	30.7	2.6	1.55	129.582	14.9483
L23-7	62	0.0001519	408200	10.79	0.73	1.67	75.2671	10.8307
L23-8	45	0.0002047	219800	4.13	0.23	1.14	105.634	16.81
L23-9	27	0.0001037	260400	5.08	0.4	1.12	101.774	21.1623
L23-10	38	0.0001229	309300	4.3	0.34	1.19	142.363	25.6917
L23-11	31	0.0001122	276300	2.35	0.15	1.19	231.098	44.0497
L23-12	107	0.0001043	1026000	14.77	0.97	1.21	137.536	16.074
L23-13	31	0.0001244	249200	2.95	0.24	1.11	166.872	32.9026
L23-14	77	0.0001667	461900	6.75	0.53	1.56	135.507	18.753
L23-15	142	0.0001039	1366000	19.6	1.3	1.69	137.984	14.7595
L23-16	22	9.725e-05	226200	4.79	0.47	1.83	93.8176	22.0186
L23-17	171	7.068e-05	2419000	38.4	2.3	1.64	124.849	12.1273
L23-18	77	6.42e-05	1199000	23.6	2.1	1.45	100.878	14.5855
L23-19	51	0.0001827	279200	4.06	0.39	2.02	136.171	23.1232
L23-20	22	7.66e-05	287200	4.12	0.33	2.04	138.013	31.4326
L23-21	45	0.0001542	291800	4.47	0.32	1.56	129.332	21.3875
L23-22	17	8.616e-05	197300	4.11	0.34	1.76	95.3587	24.4362
L23-23	134	0.0001069	1254000	17	1.1	1.99	145.953	15.7532
L23-24	48	4.974e-05	965000	16.2	1.4	1.71	118.119	19.8712
L23-25	27	0.0001015	266100	3.93	0.28	1.61	134.097	27.5187
L23-26	19	9.758e-05	194700	3.38	0.28	2.45	114.258	27.8691
L23-27	43	0.000154	279300	4.78	0.31	2.2	115.884	19.2039
L23-28	34	0.0001198	283800	4.02	0.3	2.77	139.753	26.1383
L23-29	26	0.0001116	232900	3.72	0.24	2.64	124.088	25.6187
L26-1-1	71	6.676e-05	1064000	15.5	0.75	1.34	135.93	17.4212
L26-1-2	17	0.0001012	168000	1.54	0.14	1.22	214.698	55.6096
L26-1-3	91	8.457e-05	1076000	14.7	1.1	1.23	144.843	18.6553
L26-1-4	11	5.111e-05	215200	2.51	0.13	1.29	169.334	51.8038
L26-1-5	31	3.623e-05	855700	15.96	0.95	1.21	106.412	20.1344
L26-1-6	28	6.38e-05	438800	11.86	0.86	1.19	73.6192	14.9017
L26-1-7	31	4.455e-05	695800	10.18	0.52	1.44	135.351	25.2737
L26-1-8	52	0.0001051	494600	3.46	0.24	1.6	279.902	43.4004
L26-1-9	79	7.895e-05	1001000	19.2	1.1	1.33	103.498	13.0673
L26-1-10	45	6.434e-05	699400	9.22	0.66	1.29	150.045	24.8126
L26-1-11	37	4.774e-05	775000	24.5	1.9	1.12	62.9946	11.4507
L26-1-12	55	3.073e-05	1790000	24.4	1.9	1.43	145.163	22.6032
L26-1-13	28	7.832e-05	357500	8.46	0.68	1.28	84.0163	17.254
L26-1-14	99	5.715e-05	1732000	36.2	2.7	1.22	95.0441	11.8953
L26-1-15	50	7.87e-05	635300	5.94	0.36	1.31	210.558	32.3966
L26-1-16	27	5.92e-05	456100	4.24	0.28	1.68	211.755	43.0847
L26-1-17	54	7.164e-05	753800	6.3	0.5	1.28	235.106	37.0374
L26-1-18	83	8.859e-05	936900	25.1	1.7	1.33	74.2688	9.57907
L26-1-19	126	2.553e-05	4936000	71.2	3.6	1.51	137.263	14.0606
L26-1-20	28	3.905e-05	717000	8.8	1.3	1.29	161.025	38.625
L26-1-21	38	3.892e-05	976300	8.82	0.6	1.46	217.795	38.3119
L26-1-22	41	3.853e-05	1064000	14.2	1.4	1.13	148.232	27.377
L26-1-23	90	3.029e-05	2972000	35.9	4	1.22	163.578	25.0897
L26-1-24	45	4.692e-05	959100	10.74	0.66	1.28	176.278	28.4233
L26-1-25	90	5.289e-05	1702000	28	1.7	1.38	120.511	14.6595
L26-1-26	18	2.287e-05	787100	9.63	0.55	1.23	161.526	39.1738
L26-1-27	39	5.996e-05	650500	10.76	0.73	1.21	119.862	20.8449
L26-1-28	34	7.295e-05	466100	3.39	0.25	1.39	269.441	50.2998
L26-1-29	54	2.691e-05	2007000	29.2	2.9	1.79	136.102	22.929
L26-1-30	105	3.227e-05	3253000	68.2	4.5	1.21	94.7535	11.1622
L26-1-31	37	7.035e-05	526000	6.98	0.51	1.46	149.07	26.8184
L26-1-32	47	8.573e-05	548200	6.78	0.42	1.24	159.811	25.3259
L26-1-33	63	7.602e-05	828800	15.8	1.1	1.34	104.129	14.9888
L26-1-34	24	3.73e-05	643500	5.85	0.34	1.25	216.457	45.9402
L26-1-35	66	5.696e-05	1159000	5.8	0.46	1.41	387.982	56.8121
L26-1-36	26	7.165e-05	362900	4.48	0.4	1.34	160.102	34.4994
L26-1-37	59	3.975e-05	1484000	21.6	1.6	1.64	136.044	20.3777
L26-1-38	24	8.736e-05	274700	3.8	0.47	1.32	143.067	34.146
L26-1-39	39	5.629e-05	692900	9.6	1.2	1.32	142.847	29.0179
L26-1-40	23	4.797e-05	479400	6.52	0.73	1.28	145.489	34.4334
L26-1-41	35	9.524e-05	367500	4.81	0.65	1.32	151.114	32.7023
L26-1-42	15	8.336e-05	180000	1.29	0.2	1.34	273.359	82.3277
L26-1-43	21	9.704e-05	216400	1.74	0.14	1.42	244.201	56.7959
L26-1-44	106	4.592e-05	2309000	29.7	2.5	1.3	153.734	19.7591
L26-1-45	46	8.571e-05	536700	11.7	1	1.32	91.1513	15.5344
L26-1-46	97	3.265e-05	2971000	43.5	3.1	1.31	135.251	16.7776
L26-1-47	113	0.0001086	1040000	8.42	0.66	1.49	242.558	29.701
L26-1-48	67	5.454e-05	1228000	26.8	1.7	1.14	91.0509	12.5337
L26-1-49	180	6.049e-05	2976000	32.3	3	1.63	181.796	21.6498
L26-1-50	43	3.088e-05	1393000	27.1	2.4	1.5	102.054	17.9971
L26-1-51	64	3.355e-05	1907000	19.2	2.1	1.53	195.763	32.5154
L26-1-52	34	4.637e-05	733200	12.3	1.6	1.41	118.201	25.4428
L26-1-53	56	8.633e-05	648700	6.41	0.71	1.65	199.408	34.6109
L26-1-54	93	4.649e-05	2000000	30.7	2.3	1.24	129.071	16.5117
L26-1-55	53	6.867e-05	771800	12	1.3	1.35	127.443	22.2948
L26-1-56	61	9.477e-05	643600	10.13	0.91	1.36	125.907	19.6928
L26-1-57	69	5.221e-05	1321000	17.7	2.2	1.32	147.651	25.5491
L26-1-58	60	3.015e-05	1990000	20.9	2.2	1.45	187.783	31.2799
L26-1	102	4.875e-05	2093000	25	2.8	2.39	165.401	24.7261
L26-2	21	2.374e-05	884600	11.9	1.2	1.94	147.071	35.3546
L26-3	36	6.961e-05	517200	12.3	1.3	1.95	83.6037	16.4995
L26-4	14	4.58e-05	305600	2.5	0.24	2.01	240.1	68.1835
L26-5	55	5.433e-05	1012000	16.8	1.6	1.87	119.435	19.7167
L26-6	24	4.12e-05	582500	11.6	1.3	2.11	99.7162	23.2204
L26-7	51	4.515e-05	1130000	12.4	1	1.97	179.836	29.0598
L26-8	49	4.147e-05	1181000	16.1	1.3	1.96	145.15	23.8187
L26-9	132	2.287e-05	5772000	125	10	1.99	91.7515	10.8468
L26-10	46	6.93e-05	663800	11.9	1.9	1.92	110.675	24.0528
L26-11	8	8.622e-05	92790	1.51	0.16	2.14	121.816	44.9612
L26-12	93	3.209e-05	2898000	48	6	2.31	119.704	19.4414
L26-13	50	4.849e-05	1031000	8.51	0.81	2.39	238.001	40.5717
L26-14	89	5.692e-05	1564000	20.6	2.1	2.1	150.173	22.0852
L26-15	49	5.047e-05	970800	27.2	2.5	1.76	71.0325	12.0663
L26-16	13	4.872e-05	266800	2.53	0.2	2.62	207.655	59.8869
L26-17	59	4.931e-05	1197000	15.5	1.1	2.66	152.721	22.6448
L26-18	63	6.171e-05	1021000	9.36	0.78	2.24	214.679	32.4282
L29-1-1	10	2.66e-05	376000	7.76	0.89	1.36	96.2435	32.3747
L29-1-2	25	3.366e-05	742800	6.27	0.87	1.34	232.825	56.6742
L29-1-3	34	5.751e-05	591200	7.97	0.76	1.29	146.762	28.7986
L29-1-4	104	3.422e-05	3039000	31	5.5	1.33	193.256	39.1758
L29-1-5	10	5.499e-05	181900	2.73	0.38	1.3	131.98	45.6
L29-1-6	19	4.136e-05	459400	5.47	0.48	1.28	165.918	40.7537
L29-1-7	67	2.966e-05	2259000	30.2	3.6	1.26	147.981	25.259
L29-1-8	18	5.572e-05	323000	4.09	0.38	1.4	156.135	39.5573
L29-1-9	48	3.621e-05	1326000	12.2	1.7	1.31	213.919	42.9174
L29-1-10	30	0.0001415	212000	4.83	0.4	1.19	87.2444	17.4907
L29-1-11	43	2.733e-05	1574000	33	3.9	1.26	94.7516	18.2806
L29-1-12	29	6.62e-05	438000	2.69	0.34	1.09	317.879	71.4048
L29-1-13	25	3.286e-05	760800	10.8	1	1.22	139.454	30.7349
L29-1-14	86	3.309e-05	2599000	29.5	2.8	1.47	173.941	24.9876
L29-1-15	42	3.884e-05	1081000	18.9	2.1	1.24	113.456	21.5731
L29-1-16	93	5.233e-05	1777000	33.1	3.4	1.29	106.551	15.552
L29-1-17	48	5.702e-05	841900	8.7	0.6	1.37	190.805	30.5226
L29-1-18	21	2.753e-05	762900	19.1	1.4	1.29	79.4414	18.2873
L29-1-19	26	3.704e-05	701900	12.2	1	1.32	114.119	24.2566
L29-1-20	122	4.057e-05	3007000	30	3.3	1.35	197.53	28.1414
L29-1-21	17	6.523e-05	260600	5.09	0.47	1.45	101.653	26.3808
L29-1-22	39	3.402e-05	1146000	18.5	2	1.22	122.79	23.7236
L29-1-23	43	4.214e-05	1020000	7.9	0.67	1.43	253.339	44.2065
L29-1-24	20	4.967e-05	402700	4.11	0.31	1.28	193.156	45.582
L29-1-25	50	3.284e-05	1522000	32.9	2.1	1.08	91.92	14.2622
L29-1-26	71	7.585e-05	936100	17.4	1.2	1.4	106.773	14.6559
L29-1-27	27	5.437e-05	496600	5.66	0.44	1.4	173.234	35.9561
L29-1-28	18	5.923e-05	303900	5.57	0.46	1.46	108.272	27.041
L29-1-29	68	4.869e-05	1396000	17.5	1.1	1.45	157.694	21.5395
L29-1-30	83	0.0001134	731900	12.2	1.1	1.17	118.952	16.8969
L29-1-31	22	5.003e-05	439700	6.21	0.36	1.16	140.161	30.9673
L29-1-32	29	4.475e-05	648100	9.06	0.48	1.23	141.588	27.3414
L29-1-33	81	6.791e-05	1193000	14.62	0.91	1.42	161.265	20.5383
L29-1-34	83	4.609e-05	1801000	30.6	2.3	1.27	116.72	15.5276
L29-1-35	17	7.827e-05	217200	2.44	0.18	1.13	175.723	44.5469
L29-1-36	70	5.082e-05	1377000	18.5	1.2	1.43	147.26	20.0258
L29-1-37	19	5.709e-05	332800	5.77	0.3	1.23	114.404	26.9116
L29-1-38	20	4.999e-05	400100	2.3	0.15	1.51	339.048	78.9722
L29-1-39	44	6.278e-05	700900	7.82	0.47	1.23	176.916	28.7125
L29-1-40	37	4.734e-05	781600	9.53	0.45	1.36	162.073	27.722
L29-1-41	52	5.53e-05	940400	9.64	0.65	1.41	192.323	29.656
L29-1-42	31	3.404e-05	910800	11.64	0.72	1.24	154.717	29.3899
L29-1-43	14	5.762e-05	243000	3.9	0.24	1.4	123.5	33.8704
L29-1-44	51	5.174e-05	985700	12.04	0.79	1.24	161.789	25.0188
L29-1-45	106	3.77e-05	2811000	33.9	2	1.41	163.841	18.6193
L29-1-46	57	3.938e-05	1448000	10.18	0.68	1.83	278.545	41.3203
L29-1-47	11	7.233e-05	152100	1.26	0.15	1.41	237.157	76.8776
L29-1-48	94	6.5e-05	1446000	21.6	1.1	1.27	132.596	15.2525
L29-1-49	47	8.746e-05	537400	7.66	0.5	1.48	138.891	22.1953
L29-1-50	49	7.139e-05	686400	12.84	0.74	1.37	106.102	16.3444
L29-1-51	71	6.441e-05	1102000	14.95	0.95	1.35	145.851	19.6344
L29-1-52	42	7.325e-05	573400	9.53	0.55	1.42	119.297	19.6534
L29-1-53	119	4.711e-05	2526000	29.2	2	1.33	170.834	19.5489
L29-1-54	28	4.791e-05	584400	5.81	0.42	1.6	198.213	40.1056
L29-1-55	84	9.798e-05	857300	5.31	0.39	1.39	315.258	41.4647
L29-1-56	51	9.424e-05	541200	8.48	0.58	1.23	126.47	19.7089
L29-1-57	121	5.078e-05	2383000	35.5	1.6	1.67	132.954	13.4906
L29-1	21	2.763e-05	759900	5.64	0.58	1.5	264.144	63.7208
L29-2	10	4.642e-05	215400	1.54	0.12	1.64	274.002	89.2388
L29-3	16	2.91e-05	549800	6.76	0.49	1.97	160.74	41.84
L29-4	30	5.016e-05	598100	9.39	0.86	2.05	126.224	25.7822
L29-5	45	3.581e-05	1257000	14.1	1.1	1.61	175.981	29.609
L29-6	19	2.771e-05	685600	7.44	0.58	2.14	181.823	44.0557
L29-7	14	5.264e-05	265900	3.56	0.26	2.03	147.765	40.9399
L29-8	76	2.891e-05	2629000	27.8	2.3	2.36	186.526	26.3806
L29-9	33	7.219e-05	457100	13.9	1.1	1.7	65.4757	12.5204
L29-10	38	5.759e-05	659900	4.92	0.31	1.57	262.976	45.7652
L29-11	42	9.155e-05	458800	4.49	0.3	1.61	201.312	33.8502
L29-12	89	4.678e-05	1902000	15.7	1.3	2.17	237.991	32.0115
L29-13	37	3.904e-05	947800	5.54	0.42	1.82	333.59	60.3922
L29-14	139	2.928e-05	4748000	44.3	3.9	2.05	210.995	25.7937
L29-15	132	5.626e-05	2346000	29.9	2.5	1.85	155.136	18.7238
L29-16	24	6.14e-05	390900	3.31	0.27	1.64	232.106	51.0214
L29-17	40	5.603e-05	713900	6.33	0.44	2.15	221.835	38.3151
L29-18	28	5.098e-05	549300	4.45	0.34	1.76	242.41	49.4135
L29-19	14	3.543e-05	395100	6.78	0.41	1.82	115.576	31.6699
L29-20	48	3.784e-05	1268000	18.5	1.5	1.87	135.725	22.4695
L29-21	42	4.07e-05	1032000	9.71	0.95	1.87	209.259	38.2329
L29-22	22	4.743e-05	463800	5.69	0.51	1.68	161.091	37.2564
L29-23	18	4.694e-05	383500	5.11	0.43	2.49	148.465	37.1569
L29-24	38	5.905e-05	643500	8.75	0.57	2.02	145.519	25.4386
L29-25	32	4.271e-05	749200	9.21	0.91	2.17	160.769	32.5582
L29-26	15	4.492e-05	333900	9.5	0.82	2.09	69.9561	19.0452
L32_1_00	40	9.974e-05	401000	3.84	0.25	1.64	205.664	35.1671
L32_1_01	19	7.658e-05	248100	2.68	0.21	1.99	182.649	44.2792
L32_1_02	33	6.888e-05	479100	2.3	0.17	1.61	403.935	76.392
L32_1_03	29	5.611e-05	516900	6.33	0.59	1.68	161.379	33.5304
L32_1_04	15	5.369e-05	279400	3.51	0.21	1.76	157.362	41.7071
L32_1_05	50	7.267e-05	688000	4.02	0.24	1.82	333.706	51.2261
L32_1_06	56	0.0001589	352500	4.85	0.27	1.55	143.832	20.8215
L32_1_07	45	6.31e-05	713100	8.06	0.65	1.77	174.667	29.6037
L32_1_08	40	8.712e-05	459200	6.27	0.39	1.41	144.922	24.6235
L32_1_09	21	7.536e-05	278600	5.94	0.4	1.72	93.1844	21.2807
L32_1_10	29	9.86e-05	294100	3.12	0.2	1.76	185.932	36.526
L32_1_100	27	0.0001054	256300	4.4	0.34	1.88	115.529	23.9588
L32_1_101	27	0.000102	264800	3	0.17	1.53	174.263	34.9605
L32_1_102	46	0.0001019	451600	4.56	0.25	1.7	195.204	30.7065
L32_1_103	52	6.725e-05	773200	8.79	0.54	1.67	173.672	26.3415
L32_1_104	44	0.0001763	249600	3.21	0.2	1.88	153.759	25.0817
L32_1_105	55	8.35e-05	658700	6.97	0.35	1.59	186.403	26.8209
L32_1_106	50	8.009e-05	624300	6.27	0.37	1.78	196.241	30.0719
L32_1_107	28	0.0001039	269500	4.69	0.22	1.61	113.981	22.194
L32_1_11	17	6.688e-05	254200	2.93	0.25	1.91	171.323	44.0482
L32_1_12	40	9.492e-05	421400	5.71	0.33	1.89	146.023	24.5823
L32_1_13	22	6.742e-05	326300	2.64	0.23	1.88	242.718	55.9015
L32_1_14	28	6.476e-05	432300	2.37	0.2	1.78	355.069	73.4878
L32_1_15	41	0.0001137	360700	5.64	0.58	1.85	126.731	23.6975
L32_1_16	24	5.012e-05	478800	5.11	0.31	2.03	184.835	39.3602
L32_1_17	73	5.559e-05	1313000	8.17	0.36	1.55	313.848	39.2501
L32_1_18	35	6.857e-05	510400	9.96	0.59	1.61	101.744	18.2235
L32_1_19	92	6.75e-05	1363000	13.29	0.74	1.27	202.041	23.8801
L32_1_20	93	7.802e-05	1192000	14.57	0.67	1.58	161.678	18.3398
L32_1_21	8	4.487e-05	178300	3.19	0.26	1.75	110.895	40.2355
L32_1_22	21	5.155e-05	407400	6.68	0.35	1.75	120.908	27.1343
L32_1_23	18	6.606e-05	272500	3.78	0.28	1.71	142.676	35.2507
L32_1_24	84	8.443e-05	994900	33.2	2.2	1.7	59.6926	7.62006
L32_1_25	17	4.19e-05	405700	3.67	0.24	1.71	217.512	54.6383
L32_1_26	36	8.931e-05	403100	3.33	0.25	1.81	237.807	43.47
L32_1_27	48	0.0001478	324800	5.72	0.32	2.23	112.645	17.4374
L32_1_28	27	5.625e-05	480000	4.2	0.32	1.72	224.745	46.5185
L32_1_29	32	0.0001344	238100	3.27	0.19	1.58	144.092	26.8128
L32_1_30	35	8.465e-05	413500	6.9	0.42	1.54	118.825	21.3478
L32_1_31	26	5.029e-05	517000	7.44	0.53	1.55	137.583	28.7072
L32_1_32	37	7.213e-05	512900	5.97	0.44	1.81	169.676	30.5695
L32_1_33	46	7.824e-05	587900	6.89	0.42	1.83	168.533	26.8889
L32_1_34	47	0.0001326	354500	3.22	0.24	1.68	216.638	35.4862
L32_1_35	22	0.0001482	148400	2.39	0.16	2.23	123.076	27.5032
L32_1_36	59	0.0001502	392900	4.71	0.27	1.63	164.812	23.4446
L32_1_37	15	6.488e-05	231200	3.92	0.27	1.6	116.963	31.2557
L32_1_38	45	7.859e-05	572600	8.21	0.41	1.81	138.083	21.7085
L32_1_39	20	8.765e-05	228200	3.56	0.24	1.61	127.02	29.6653
L32_1_40	34	8.93e-05	380700	5.77	0.36	1.82	130.704	23.8528
L32_1_41	40	9.343e-05	428100	7.83	0.42	1.63	108.496	18.1151
L32_1_42	72	0.0001462	492600	6.98	0.44	1.62	139.706	18.6719
L32_1_43	20	4.556e-05	438900	1.53	0.15	1.91	549.932	134.269
L32_1_44	42	8.326e-05	504400	3.95	0.22	1.52	250.611	41.1121
L32_1_45	29	7.164e-05	404800	3.61	0.32	1.66	220.583	45.3889
L32_1_46	29	6.264e-05	463000	6.09	0.53	1.58	150.376	30.8388
L32_1_47	56	0.0001222	458400	3.91	0.2	2.2	230.448	32.9739
L32_1_48	68	4.995e-05	1361000	3.51	0.26	1.98	732.702	104.118
L32_1_49	45	0.0001073	419300	8.04	0.45	1.7	103.53	16.4854
L32_1_50	26	8.256e-05	314900	7.02	0.51	1.73	89.1498	18.6448
L32_1_51	47	0.0001012	464400	4.88	0.32	1.71	187.684	30.0156
L32_1_52	52	0.0001194	435600	6.58	0.33	1.76	131.138	19.3383
L32_1_53	30	7.132e-05	420600	3.55	0.21	2.11	232.844	44.687
L32_1_54	47	9.626e-05	488300	10.09	0.72	1.68	96.1268	15.6095
L32_1_55	36	0.0001066	337800	3.01	0.18	1.8	220.763	39.0906
L32_1_56	14	0.000104	134600	2.38	0.15	1.67	112.195	30.8079
L32_1_57	32	8.659e-05	369600	5.88	0.28	1.47	124.578	22.8076
L32_1_58	38	7.328e-05	518600	5.93	0.34	1.51	172.679	29.7104
L32_1_59	33	8.821e-05	374100	5.72	0.53	1.61	129.572	25.5518
L32_1_60	59	0.0001266	466000	9.88	0.85	1.97	93.7044	14.6223
L32_1_61	18	7.759e-05	232000	2.63	0.19	1.89	174.158	42.9344
L32_1_62	26	7.881e-05	329900	6.41	0.46	1.72	102.181	21.3388
L32_1_63	32	9.533e-05	335700	3.61	0.24	1.78	183.46	34.6491
L32_1_64	26	6.935e-05	374900	4	0.25	1.9	184.886	38.0559
L32_1_65	29	0.0001082	268000	3.56	0.23	1.51	148.919	29.2794
L32_1_66	28	5.229e-05	535400	4.48	0.29	1.95	234.832	46.9103
L32_1_67	33	7.894e-05	418100	2.63	0.19	1.69	310.537	58.5279
L32_1_68	27	5.549e-05	486600	8.07	0.43	1.49	119.552	23.8733
L32_1_69	46	8.659e-05	531300	4.62	0.25	1.78	226.126	35.5149
L32_1_70	118	7.348e-05	1606000	13.11	0.75	1.38	240.605	26.078
L32_1_71	50	0.0001018	491400	4.58	0.29	1.77	211.216	32.7277
L32_1_72	21	0.000166	126500	2.81	0.19	1.6	89.466	20.4388
L32_1_73	46	0.0001445	318400	4.12	0.27	2.2	152.83	24.6591
L32_1_74	28	0.0001383	202400	4.48	0.25	1.6	89.7834	17.6917
L32_1_75	21	5.472e-05	383800	3.71	0.28	1.97	203.77	47.0506
L32_1_76	20	5.272e-05	379400	8.32	0.5	1.64	90.6169	20.9816
L32_1_77	24	5.179e-05	463500	4.79	0.27	1.82	190.793	40.4031
L32_1_78	25	9.657e-05	258900	3.11	0.17	2	164.479	34.1023
L32_1_79	88	0.0001538	572100	8.17	0.66	1.66	138.632	18.5423
L32_1_80	45	9.044e-05	497600	7.76	0.47	1.82	127.064	20.4453
L32_1_81	69	0.0001592	433400	5.67	0.42	1.51	151.18	21.3693
L32_1_82	49	0.0001016	482500	6.04	0.36	1.73	157.914	24.4439
L32_1_83	25	0.0001071	233400	2.98	0.19	1.84	154.863	32.5085
L32_1_84	22	6.819e-05	322600	4.39	0.28	1.94	145.407	32.3583
L32_1_85	40	7.022e-05	569600	9.22	0.66	1.82	122.461	21.2548
L32_1_86	36	7.24e-05	497300	4.57	0.29	1.68	214.17	38.1948
L32_1_87	44	0.0001342	327800	5.38	0.53	2.12	120.793	21.7535
L32_1_88	44	0.000117	376200	5.82	0.44	1.88	128.075	21.5999
L32_1_89	70	9.469e-05	739200	11.7	0.93	1.7	125.211	17.9729
L32_1_90	21	8.586e-05	244600	2.31	0.17	1.79	208.494	48.0148
L32_1_91	44	7.647e-05	575400	8.2	0.52	1.49	138.918	22.7201
L32_1_92	30	7.045e-05	425800	7.22	0.61	1.59	116.954	23.5282
L32_1_93	36	7.333e-05	491000	3.94	0.27	1.98	244.685	44.0936
L32_1_94	15	5.45e-05	275300	2.41	0.17	1.52	224.642	60.128
L32_1_95	30	8.406e-05	356900	3.34	0.33	1.62	210.371	43.6717
L32_1_96	26	5.977e-05	435000	5.86	0.53	1.85	146.868	31.7185
L32_1_97	19	7.309e-05	259900	3.89	0.26	1.74	132.337	31.6225
L32_1_98	46	0.0001073	428800	7.02	0.55	1.81	121.094	20.2186
L32_1_99	31	9.549e-05	324600	5.13	0.39	1.84	125.398	24.4567
L35-1	63	8.804e-05	715600	16.87	0.9	1.42	84.334	11.5384
L35-2	16	4.35e-05	367800	6.13	0.45	1.8	118.968	30.9976
L35-3	25	4.086e-05	611900	14.67	0.99	2.66	82.9363	17.5061
L35-4	11	0.0001034	106400	3.06	0.26	1.94	69.2114	21.6808
L35-5	11	0.0001114	98720	0.605	0.055	2.02	318.542	100.315
L35-6	36	0.0001204	299000	5.15	0.3	1.82	115.152	20.3304
L35-7	16	8.593e-05	186200	4.54	0.34	1.47	81.5577	21.2846
L35-9	68	8.01e-05	849000	16.37	0.84	1.57	102.962	13.5578
L35-10	38	0.0001262	301100	8.66	0.5	1.83	69.2071	11.9168
L35-11	68	7.931e-05	857400	25.5	1.4	1.89	66.9388	8.91068
L35-12	34	0.0001186	286800	2.21	0.13	2.57	254.609	46.1622
L35-13	140	4.447e-05	3148000	43.2	2.1	1.68	144.203	14.0596
L35-15	45	0.0001078	417300	9.74	0.53	1.82	85.1743	13.5165
L35-17	18	0.0001182	152200	2.87	0.13	1.66	105.262	25.2646
L35-19	43	6.953e-05	618400	13.95	0.61	1.71	88.108	13.9778
L35-20	25	7.441e-05	336000	5.92	0.24	1.87	112.593	22.9765
L35-21	25	7.804e-05	320300	1.084	0.054	1.8	565.747	116.606
L35-22	16	8.86e-05	180600	2.14	0.14	1.65	166.712	43.0814
L35-23	25	9.145e-05	273400	4.97	0.26	1.62	109.157	22.5659
L35-24	40	9.373e-05	426800	11.34	0.68	1.69	74.882	12.6628
L35-25	95	6.841e-05	1389000	30.7	1.8	1.86	89.9131	10.625
L35-26	73	6.413e-05	1138000	21.21	0.85	1.92	106.488	13.1739
L35-27	34	6.997e-05	485900	14.14	0.7	1.72	68.4042	12.2102
L35-28	73	0.0001048	696800	14.61	0.68	1.63	94.7444	11.9336
L35-1-1	30	9.328e-05	321600	8.18	0.51	1.32	78.2019	15.0872
L35-1-2	15	0.0001046	143400	0.785	0.059	1.58	355.58	95.6211
L35-1-3	113	8.028e-05	1408000	41.1	5.1	1.69	68.1951	10.619
L35-1-4	25	3.573e-05	699600	11.89	0.86	1.63	116.687	24.8167
L35-1-5	23	3.01e-05	764100	15.8	1.4	1.35	96.0604	21.7635
L35-1-6	15	0.0001905	78740	1.16	0.11	1.48	134.429	36.9762
L35-1-7	56	7.712e-05	726100	17.1	1.5	1.68	84.4199	13.4945
L35-1-8	21	5.303e-05	396000	10.58	0.85	1.5	74.4714	17.3174
L35-1-9	13	7.111e-05	182800	6.28	0.65	1.59	57.99	17.167
L35-1-10	48	8.74e-05	549200	13.5	1.2	1.62	80.9021	13.7139
L35-1-11	26	0.0001189	218700	0.804	0.08	1.27	522.591	114.925
L35-1-12	29	6.438e-05	450400	14.5	1.1	1.53	61.8637	12.4095
L35-1-13	28	9.335e-05	300000	6.04	0.53	1.59	98.639	20.5525
L35-1-15	15	0.0002133	70340	1.024	0.086	1.23	136.02	36.9315
L35-1-16	21	3.576e-05	587200	8	0.65	1.69	145.24	33.8196
L35-1-17	61	9.381e-05	650200	11.3	1.1	1.57	114.133	18.3571
L35-1-18	58	6.13e-05	946200	22.9	2.1	1.45	82.1615	13.1589
L35-1-19	35	7.34e-05	476800	5.74	0.55	1.55	164.125	31.8896
L35-1-20	57	5.068e-05	1125000	34	2.7	1.65	65.8785	10.1739
L35-1-21	34	4.883e-05	696300	7.04	0.51	1.59	194.954	36.2948
L35-1-22	37	7.651e-05	483600	4.35	0.37	1.76	218.726	40.486
L35-1-23	69	8.853e-05	779400	11.5	1.3	1.59	134.222	22.1656
L35-1-24	20	9.393e-05	212900	4.37	0.3	1.44	96.7658	22.6343
L35-1-25	93	6.131e-05	1517000	20.7	1.6	1.52	145.015	18.7553
L35-1-27	46	5.752e-05	799700	19.8	1.6	1.5	80.3239	13.5052
L35-1-28	64	0.0001206	530700	8.98	0.87	1.58	117.195	18.5343
L35-1-29	80	5.752e-05	1391000	19.5	1.7	1.58	141.195	20.018
L35-1-30	22	8.079e-05	272300	5.79	0.43	1.39	93.4349	21.0944
L35-1-31	56	5.698e-05	982800	23.6	1.8	1.31	82.8042	12.7407
L35-1-32	17	3.422e-05	496800	10.48	0.82	1.44	94.1749	24
L35-2-1	18	0.0001261	142700	2.94	0.35	1.29	96.4087	25.4577
L35-2-2	24	5.598e-05	428700	3.62	0.41	1.38	232.741	54.3311
L35-2-3	45	3.41e-05	1320000	33	3.7	1.25	79.5552	14.8394
L35-2-4	41	7.209e-05	568700	5.16	0.5	1.24	216.87	39.859
L35-2-5	76	7.861e-05	966800	15.6	1.6	1.23	122.845	18.9027
L35-2-6	68	9.964e-05	682500	15.7	1.6	1.3	86.4132	13.6882
L35-2-7	26	4.634e-05	561100	11.8	1.1	1.23	94.4634	20.5122
L35-2-9	26	8.213e-05	316600	4.75	0.5	1.49	132.024	29.386
L35-2-10	41	0.0001792	228700	4.24	0.27	1.35	107.049	18.0545
L35-2-11	64	5.065e-05	1264000	14.04	0.86	1.3	177.694	24.7352
L35-2-12	14	0.0001164	120300	0.923	0.071	1.28	255.69	71.1102
L35-2-13	49	9.697e-05	505300	7.86	0.57	1.35	127.385	20.4084
L35-2-14	36	5.165e-05	697000	4.88	0.99	1.15	279.672	73.4285
L35-2-15	45	8.772e-05	513000	9.5	0.86	1.37	107.169	18.6909
L35-2-16	21	7.367e-05	285000	4.08	0.48	1.19	138.296	34.2851
L35-2-17	33	8.088e-05	408000	8.5	1.4	1.28	95.3491	22.8502
L35-2-18	13	0.0001789	72660	0.729	0.086	1.24	196.438	59.2057
L35-2-19	28	0.0001343	208500	3.64	0.4	1.23	113.622	24.8389
L35-2-21	43	7.905e-05	544000	7.32	0.79	1.34	147.034	27.4695
L35-2-22	26	6.12e-05	424800	5.05	0.56	1.24	166.178	37.4394
L35-2-23	40	8.792e-05	455000	8	0.69	1.23	112.825	20.3208
L35-2-24	58	3.715e-05	1561000	20	1.3	1.26	154.332	22.6118
L35-2-25	36	9.514e-05	378400	7.86	0.52	1.19	95.6301	17.1481
L35-2-26	35	5.248e-05	666900	10.46	0.52	1.47	126.345	22.2607
L35-2-27	108	8.138e-05	1327000	19.04	0.83	1.32	137.987	14.5768
L35-2-28	67	4.29e-05	1562000	22.9	1.1	1.26	135.076	17.7319
L35-2-29	55	7.287e-05	754800	14.9	1	1.26	100.588	15.1504
L35-2-30	74	0.0001575	469900	4.24	0.24	1.28	218.054	28.1936
L35-2-31	42	0.0001256	334500	5.93	0.43	1.28	111.907	19.0793
L35-2-32	52	0.0001188	437700	12.49	0.89	1.32	69.7515	10.875
L35-2-33	19	0.0001033	184000	5.22	0.35	1.11	70.1573	16.7685
L35-2-34	94	0.0001235	760900	14.9	1.6	1.24	101.394	15.0969
L35-2-35	21	0.0001071	196100	5.55	0.45	1.26	70.3242	16.3711
L35-2-36	22	9.013e-05	244100	2.75	0.19	1.36	175.231	39.2721
L35-2-37	46	0.0001156	398000	8.53	0.57	1.28	92.7041	15.0067
L35-2-38	40	0.000224	178600	3.25	0.27	1.09	109.046	19.4768
L35-2-39	91	9.693e-05	938800	23	2	1.33	81.1707	11.0555
L35-2-40	86	0.0001169	736000	13	1	1.36	112.315	14.877
L35-2-41	85	0.0001441	590000	6.68	0.51	1.31	174.373	23.129
L35-2-42	118	7.299e-05	1617000	33.9	2	1.3	94.7558	10.3606
L35-2-43	45	0.0001601	281100	3.81	0.24	1.39	145.982	23.6249
L35-2-44	50	0.0001622	308200	7.7	0.59	1.26	79.6066	12.8043
L35-2-45	22	0.0001047	210200	4.83	0.32	1.33	86.5086	19.3137
L35-2-46	26	0.000126	206400	0.746	0.061	2.19	531.186	112.866
	Notes: The data in red indicate these data not analyzed when plotting, due to the content of uranium in these apatites are too low. For these data in blue, we also exclude them when plotting due to their abnormal AFT ages.
